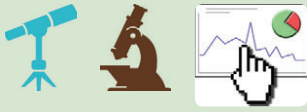

Tree Physiology 37, 1113–1127  
doi:10.1093/treephys/tpx042

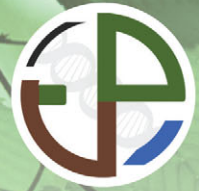

## Research paper

# The effect of interspecific variation in photosynthetic plasticity on 4-year growth rate and 8-year survival of understorey tree seedlings in response to gap formations in a cool-temperate deciduous forest

Riichi Oguchi<sup>1,3</sup>, Tsutom Hiura<sup>2</sup> and Kouki Hikosaka<sup>1</sup>

<sup>1</sup>Graduate School of Life Sciences, Tohoku University, 6-3, Aramaki Aza-Aoba, Aoba-ku, Sendai, Miyagi 980-8578, Japan; <sup>2</sup>Tomakomai Experimental Forest, Field Science Center for Northern Biosphere, Hokkaido University, Aza-Takaoka, Tomakomai 053-0035, Japan; <sup>3</sup>Corresponding author (riichi@biology.tohoku.ac.jp)

Received November 10, 2016; accepted March 30, 2017; published online April 19, 2017; handling Editor João Pereira

Gap formation increases the light intensity in the forest understorey. The growth responses of seedlings to the increase in light availability show interspecific variation, which is considered to promote biodiversity in forests. At the leaf level, some species increase their photosynthetic capacity in response to gap formation, whereas others do not. Here we address the question of whether the interspecific difference in the photosynthetic response results in the interspecific variation in the growth response. If so, the interspecific difference in photosynthetic response would also contribute to species coexistence in forests. We also address the further relevant question of why some species do not increase their photosynthetic capacity. We assumed that some cost of photosynthetic plasticity may constrain acquisition of the plasticity in some species, and hypothesized that species with larger photosynthetic plasticity exhibit better growth after gap formation and lower survivorship in the shade understorey of a cool-temperate deciduous forest. We created gaps by felling canopy trees and studied the relationship between the photosynthetic response and the subsequent growth rate of seedlings. Naturally growing seedlings of six deciduous woody species were used and their mortality was examined for 8 years. The light-saturated rate of photosynthesis ( $P_{\max}$ ) and the relative growth rate (RGR) of the seedlings of all study species increased at gap plots. The extent of these increases varied among the species. The stimulation of RGR over 4 years after gap formation was strongly correlated with change in photosynthetic capacity of newly expanded leaves. The increase in RGR and  $P_{\max}$  correlated with the 8-year mortality at control plots. These results suggest a trade-off between photosynthetic plasticity and the understorey shade tolerance. Gap-demanding species may acquire photosynthetic plasticity, sacrificing shade tolerances, whereas gap-independent species may acquire shade tolerances, sacrificing photosynthetic plasticity. This strategic difference among species would contribute to species coexistence in cool-temperate deciduous forests.

**Keywords:** acclimation, *Acer japonicum*, *Acer mono*, cost of plasticity, forest regeneration, *Fraxinus lanuginosa*, *Kalopanax pictus*, *Magnolia obovata*, phenotypic plasticity, photosynthetic capacity, *Quercus crispula*, species coexistence.

## Introduction

Gap formation caused by disturbances or senescence of canopy trees increases light intensity in the forest understorey, which is essential for tree regeneration in forests (Ellenberg 1939, Watt 1947, Naka 1982, Nakashizuka and Numata 1982, Denslow et al. 1990, Ryel and Beyschlag 2000). Most understorey seedlings are not able to grow into a canopy tree without gap formation

(Denslow 1987, Whitmore 1996, Bungard et al. 2000). The increase in irradiance enhances photosynthesis rates and stimulates the growth of seedlings (Percy 1983, Canham 1988). Space for the young trees to expand their branches is also provided by gap formation. Subsequent to gap formation, the growth responses of seedlings to the increase in light availability show interspecific variation, which is considered one of the factors

contributing to the coexistence of species and may promote biodiversity in forests (Phillips et al. 1994, Grubb et al. 1996, Hiura et al. 1996, Aiba and Kohyama 1997, Beckage and Clark 2003, Pearson et al. 2003, Silvertown 2004, Pooter and Kitajima 2007). If the response to gap formation was similar among different species, the coexistence of these species may become difficult because of the competitive exclusion principle. However, the interspecific variation in response to gap formation indicates niche separation in terms of using light resources (Aiba and Kohyama 1997). Therefore, the growth response to the increase in light availability has been studied in many species (Langenheim et al. 1984, Whitmore and Brown 1996, Pooter 1999, Valladares et al. 2000).

At the leaf level, changes in photosynthetic capacity occur in response to gap formation. These changes can be achieved by the acclimation of leaves that have already developed before gap formation and/or by the production of new leaves with different properties. Which of these responses occurs has been found to vary with species (Loach 1967, Pearcy and Sims 1994, Valladares et al. 2000, Yamashita et al. 2000, Oguchi et al. 2005, Rodriguez-Calcerrada et al. 2008). Some species increase their photosynthetic capacity per leaf area to maximize the efficiency of light use under the higher light condition, whereas others do not respond or even decrease their photosynthetic capacity, often as a result of photoinhibition (Chazdon 1992, Mulkey and Pearcy 1992, Lovelock et al. 1998, Krause et al. 2001).

Does this interspecific difference in the photosynthetic response contribute to the variation in the growth response subsequent to gap formation and contribute to species coexistence in forests? The answer to this question remains unclear. Not only the photosynthetic capacity of leaves, but also the morphological traits such as the leaf area ratio (LAR; leaf area per plant mass) and specific leaf area (SLA; leaf area per leaf mass), affect the growth rates of seedlings (Grubb et al. 1996, Wright and Westoby 2000). Besides, both photosynthetic capacity and the morphological parameters could be acclimating to the newly formed gap condition (Loach 1970, Grime 1979, Valladares et al. 2000); thus, both acclimation processes—physiological and morphological—may affect the subsequent growth of seedlings. For example, in within-species responses, high photosynthetic capacity per leaf area requires a high nitrogen cost per leaf area (Hikosaka and Terashima 1995, Terashima et al. 2001), therefore some plants might be required to decrease total leaf area to increase their photosynthetic capacity per leaf area, especially when nitrogen resources are limited. This may mitigate the contribution of the photosynthetic response to the carbon uptake. Actually, many species show lower LAR in high light compared with low light, and such morphological plasticity varies among species (Loach 1970, Valladares et al. 2000). If the within-species plasticity of the morphological traits shows a large interspecific variation in response to gap formation, the

interspecific variations of growth after gap formation may depend not on the photosynthetic plasticity but on the morphological plasticity. Many studies have examined the photosynthetic response of seedlings to changes in the light environment, which mimicked gap formation (Naidu and Delucia 1997a, 1997b, Yamashita et al. 2000). For example, in Kitajima (1994), morphological and photosynthetic traits of seedlings were studied in sun and shade conditions and morphological variables showed stronger correlations with the mortality in shade than photosynthetic variables among 13 tropical species. In Valladares et al. (2000), the gap species showed a higher mean phenotypic plasticity of seven photosynthetic and morphological traits than shade species. However, the previous studies examined relatively short-term (<1 year) growth responses of newly germinated seedlings, which may be affected by seed quality and other nursery environments and not necessarily reflect the actual performance of understory young plants. Besides, most of the studies were conducted with tropical or subtropical species and studies with temperate deciduous species, which have considerably smaller range of leaf lifespan compared with the tropical species, are still scarce (e.g., a study with two deciduous species by Einhorn 2007).

One more question remains regarding photosynthetic plasticity: why does the photosynthetic acclimation capacity vary among species? The costs of high photosynthetic capacity, e.g., high respiration rate, high nitrogen content and high light compensation point, have been reported by previous studies (Boardman 1977, Mooney and Gulmon 1979, Björkman 1981), therefore maintaining high photosynthetic capacity is considered to be too costly for success in the shade conditions (Mooney and Gulmon 1979). However, photosynthetic plasticity does not require such costs of high photosynthetic capacity in shade, because photosynthetic plasticity is the ability to develop shade leaves with lower photosynthetic capacity in low light condition and to develop sun leaves with higher photosynthetic capacity only in high light conditions. If this photosynthetic light acclimation could improve the subsequent growth of seedlings, why is it that some species do not increase their photosynthetic capacity subsequent to gap formation? Although previous studies, especially in the 1970s and 1980s, studied what type of species show high photosynthetic plasticity (Loach 1967, Grime 1979), the physiological mechanisms underlying the interspecific variation of plasticity have not yet been elucidated, and the eco-physiological meaning of the interspecific variation is still unclear. For example, it has been hypothesized that pioneer species should be expected to exhibit greater phenotypic plasticity than late-successional species (Bazzaz 1979, Bazzaz and Carlson 1982). However as Rijkers et al. (2000) suggested, increasing evidence has indicated that plasticity is not necessarily related to the successional status of a species (Turnbull 1991, Popma et al. 1992). We assumed that the photosynthetic plasticity may incur costs, such as maintenance, production,

information acquisition (e.g., cost of sensors and signal transduction pathways), developmental instability (i.e., noise caused by developmental error and environmental uncertainty) and genetic costs, which were originally suggested as potential costs of phenotypic plasticity by DeWitt et al. (1998). For example, we previously showed that plants need to cope with production cost to have an extra leaf thickness for acquiring the light acclimation capacity of fully developed leaves (Oguchi et al. 2003, 2005). Fully developed leaves usually lost the ability to change their thickness, therefore extra leaf thickness to possess the space for increasing the amount of chloroplasts is necessary for the plasticity to respond to the increase in irradiance. Because the frequency of gap formation is much less than the frequency of seedling germination and not all seedlings can benefit from gap formation, the strategy underlying the investment in the photosynthetic light acclimation capacity should vary among species. If the species is not gap demanding, an investment in the cost of the photosynthetic light acclimation would be wasteful and thus the acclimation capacity would not be acquired. In fact, some previous studies detected a reduction in fitness related to phenotypic plasticity in several traits such as leaf petiole and internode lengths, suggesting that these costs may constrain the evolution of these plasticities in some species (Dorn et al. 2000, Weijsschede et al. 2006, Dechaine et al. 2007, Bell and Galloway 2008). Although there are not enough clues to suggest a particular cost of photosynthetic plasticity so far (see Lambers et al. (2008) for the mechanism of photosynthetic plasticity), the present study considered that the cost of the photosynthetic plasticity would negatively affect the survivorship in shade conditions. A meta-analysis by Walters and Reich (1999) suggested that there was no clear correlation between photosynthetic plasticity and shade tolerance. However, they used a wide variety of species that do not coexist in a forest, and the shade tolerance was not based on mortality measurement but on published tolerance classifications. In the present study, we hypothesized that if we compare multiple coexisting species in one forest, species with larger photosynthetic plasticity will show better stimulation of growth after gap formation and lower survivorship in the shade understorey.

To test the hypothesis and answer the above questions, we conducted a long-term monitoring of photosynthetic capacity, growth rate and mortality of naturally grown tree seedlings, which responded to gap formations created by felling canopy trees in a natural cool-temperate deciduous forest. The forest has not been planted or managed by humans nor grazed by livestock until the creation of three gaps, which imitates canopy tree falling because of strong winds. We used six deciduous woody species belonging to three different life forms. In our previous study, we reported interspecific differences in the mechanisms underlying photosynthetic light acclimation in already fully developed leaves during the first year subsequent to gap formation as well as the effect of the photosynthetic responses of the already

developed leaves on the leaf carbon balance (Oguchi et al. 2006, 2008). In the present study, we further report on the responses of newly developed leaves during the years following the gap formation and their effect on the growth rates of the seedlings. The photosynthetic responses and growth rates were continuously examined for 4 years, and the mortality was analysed 8 years after the gap formation.

## Materials and methods

### The study site

The study site is located in the Tomakomai Experimental Forest (TOEF), Hokkaido University, Hokkaido, Japan (42°41'N, 141°36'E, 65 m elevation; see Hiura (2001) for details). The study site is 50 m wide and 120 m long, and was established on a flat plateau in the temperate deciduous broad-leaved forest. In this forest, canopy leaf expansion begins during the middle of May and leaf abscission begins during the middle of October. Seedlings expand their leaves after the canopy leaf expansion (Maeno and Hiura 2000, Takafumi et al. 2010). The densities of trees, which showed diameter from 10 to 100 mm and >100 mm, were 3164 and 718 ha<sup>-1</sup>, respectively. These values are comparable to that of other cool-temperate deciduous forests (Hiura 1995, Masaki et al. 1999). The monthly mean air temperature of the site from 1986 to 2000 ranged from -3.2 to 19.1 °C. The average annual rainfall of the site in the 15 years was 1200 mm. The soil at the study site was volcanogenous regosol comprising mainly classic pumice and sand (Shibata et al. 1998). The dominant species in the site were *Quercus crispula*, *Acer mono*, *Sorbus alnifolia*, *Tilia japonica* and *Acer amoenum*. Except for *A. amoenum*, these species are common dominant species of the forest, according to surveys in 38 other sites in the forest (Hiura 2001). Because of a large volcanic eruption that occurred ~300 years prior to the current study, the age of the forest is relatively young. In addition, a large typhoon devastated the forest in 1954 (the Touya-maru typhoon), resulting in most of the canopy trees falling at that time. The average canopy height at the site was ~18 m, and no canopy gaps larger than 2 m across existed before the experiment. The understorey of this mature secondary forest was mainly covered by ferns, among which *Dryopteris crassirhizoma* was the most dominant species. The dry mass of the foliage of understorey herbal and woody plants, which are <1 m tall, was 30–40 g m<sup>-2</sup> (Takafumi and Hiura 2009).

On 19 July 2002, three gaps (each 10 m in diameter) were created along the longer axis of the site by pulling down one or two canopy trees using a cable attached to a bulldozer winch from outside the site. The size of the created gaps was equivalent to the size of naturally formed gaps most commonly observed in natural forests (Denslow 1987, Yamamoto 1989, Denslow et al. 1998). We called these three gap areas 'gap plots'. We also established three plots for controls in the site near the gaps (see

Figure S1 available as Supplementary Data at *Tree Physiology* Online).

During September 2004, i.e., 2 years after the initiation of the present study, a large typhoon (number 18) had major effects on the natural forest, causing many branches and leaves to fall. Although the damage was less severe than in a nearby area of densely planted forest, the light intensity at the control plots was increased by the damage (see Figure S2 available as Supplementary Data at *Tree Physiology* Online). The strike of a large typhoon is so infrequent in this area of Japan (Hokkaido island) that this increase in light intensity at control plots was an unexpected event. The geophysical data on the same typhoon, which hit other research forests on Hokkaido island, have been reported by Toda et al. (2011).

### Plant materials

We studied naturally growing seedlings of six woody species: (i) *Kalopanax pictus*, (ii) *Magnolia obovata*, (iii) *Q. crispula*, (iv) *A. mono*, (v) *Acer japonicum* and (vi) *Fraxinus lanuginosa* (Table 1). These species belong to three different life forms. *Kalopanax pictus* and *M. obovata* are fast-growing canopy trees, *Q. crispula* and *A. mono* are dominant canopy trees and *A. japonicum* and *F. lanuginosa* are sub-canopy trees. *Kalopanax pictus* and *M. obovata* possess an orthotropic branching pattern, which is often seen in fast-growing species (Poorter et al. 2006), although their shade tolerance is high and they often grow up in gaps from saplings that already existed before gap creation (Yamamoto 1989, Cao and Ohkubo 1998, Hoshino et al. 2003). It should be also noted that *M. obovata* possesses extraordinarily large leaves for a northern cool-temperate forest tree (up to 30 cm long). *Acer mono* is characterized by its slow and less plastic growth, indicating that it is a typical slow-growing, shade-tolerant species (Koike 1988, Umeki 2001, Nabeshima and Hiura 2004). *Quercus crispula* is one of the dominant tall tree species, which form mature forests on alluvial plains in central and northern Japan (Sakai et al. 1999). *Fraxinus lanuginosa* and *A. japonicum* rarely reach the canopy layer (Hara 1985, Ishida and Hiura 1998, Nabeshima and Hiura 2008). At least two individuals per species were identified at each plot, and from 6 to 12 plants in total per species per condition (gap or control) were used. None of the seedlings was derived from vegetative regeneration. Most of the seedlings were 10–30 cm tall and the age of these seedlings was estimated to

be 2–10 years old, based on the height-growth curves published for the study species by Fujimoto and Motai (1981). Although both study sites of the present study and that of Fujimoto and Motai (1981) were not fenced to exclude large herbivores, there was no observation of plants eaten by large herbivores, because of the low density of large herbivores.

### Environmental factors

During the first year after gap formation irradiances and air temperatures were measured every 15 min at the three gap and control plots (luxmeter, HLI and SLA08 for irradiance, thermistor WTA32-05+37 for the air temperature, Onset Computer Corp., Bourne, MA, USA) from 7 July to 18 August. Sensors were placed 30 cm above the ground. Luxmeters for gap plots and control plots were calibrated by a photosynthetic photon flux density (PPFD) sensor (LI-190SA, LI-COR Inc., Lincoln, NE, USA) using the diurnal variation in insolation in the forest understorey of a forest gap and a control plot, respectively, to convert lux into PPFD. Temperature sensors were covered with a plastic shade to avoid exposure to direct sunlight. Relative irradiance was calculated based on simultaneous measurements of irradiance at the gap or control plots and above the forest canopy. These measurements were conducted 20 times at each plot using two quantum sensors (LI-190SA) during a cloudy day before (6 July 2002) and after gap formation (9 September 2002). For every seedling, hemispherical canopy photographs were taken using a digital camera (Coolpix 990; Nikon, Tokyo, Japan) equipped with a fish-eye lens (FC-E8, Nikon). The hemispherical photographs were taken every summer from 2002 to 2005 to analyse the change in the light environment after gap formation. The top element of the lens was positioned 5–10 cm above the leaves and the camera was carefully levelled. The hemispherical photographs were analysed using the software program CanopOn2 (free software programmed by A. Takenaka available from: <http://takenaka-akio.org/etc/canopon2/>), assuming a standard overcast sky condition.

Mean air temperature was 0.2 °C higher at the gap plots than that at the control plots, although the mean maximum temperature at the gap plots was ~1 °C higher than that at control plots (Table 2). No significant differences in the mean air temperature between control and gap plots were reported in previous studies, although the maximum air temperature significantly increased

Table 1. The maximum height ( $H_{\max}$ ), the branching pattern, the order of the shade tolerance observed in the present study (the inverse order of the 8-year mortality in the control plot) and the life forms of the six tree species that were used in the present study.

| Species                    | $H_{\max}$ (m) | Branching pattern | Shade tolerance | Life forms               |
|----------------------------|----------------|-------------------|-----------------|--------------------------|
| <i>Kalopanax pictus</i>    | 25             | Orthotropic       | Third           | Fast-growing canopy tree |
| <i>Magnolia obovata</i>    | 30             | Orthotropic       | First           | Fast-growing canopy tree |
| <i>Quercus crispula</i>    | 30             | Ordinary          | Sixth           | Dominant canopy tree     |
| <i>Acer mono</i>           | 20             | Ordinary          | Second          | Dominant canopy tree     |
| <i>Acer japonicum</i>      | 10             | Ordinary          | Fourth          | Sub-canopy tree          |
| <i>Fraxinus lanuginosa</i> | 15             | Ordinary          | Fifth           | Sub-canopy tree          |



Table 2. Relative photosynthetic photon flux density (PPFD) calculated from the simultaneous measurements of irradiance at the gap and control plots and above the forest canopy, mean daily integrated PPFD, mean air temperature, and mean maximum and mean minimum air temperature at gap and control plots before and after the gap formation during 2002 (from 7 July to 18 July, and from 20 July to 18 August, respectively). The mean  $\pm$  standard error are shown. The data are from Oguchi et al. (2006).

|                                                                |        | Gap             | Control         |
|----------------------------------------------------------------|--------|-----------------|-----------------|
| Relative irradiance (%)                                        | Before | 1.77 $\pm$ 0.14 | 2.19 $\pm$ 0.28 |
|                                                                | After  | 10.6 $\pm$ 3.7  | 2.55 $\pm$ 0.40 |
| Mean daily irradiance (mol m <sup>-2</sup> day <sup>-1</sup> ) | Before | 0.74 $\pm$ 0.13 | 0.54 $\pm$ 0.15 |
|                                                                | After  | 3.07 $\pm$ 0.41 | 0.54 $\pm$ 0.06 |
| Mean temperature (°C)                                          | Before | 17.5 $\pm$ 0.02 | 17.5            |
|                                                                | After  | 18.3 $\pm$ 0.01 | 18.1            |
| Mean maximum/minimum temperature (°C)                          | Before | 19.9/15.8       | 19.8/15.8       |
|                                                                | After  | 21.8/16.3       | 20.8/16.3       |

when gap plots were exposed to direct sunlight (Naidu and Delucia 1998, Schmidt et al. 1998, Clinton 2003). Soil nitrogen availability did not show a large change after the gap formation (Oguchi et al. 2006).

### Photosynthesis and leaf characteristics

Every mid-August from 2002 to 2005, photosynthetic rates were determined using a portable open gas exchange system (LI-6400, LI-COR Inc.). Light was provided by a light emitting diode (model 6400-02B, LI-COR Inc.). During the first year (2002), only leaves that ceased expansion before gap formation were used for the photosynthetic measurements. From the second year, the uppermost fully developed leaves were used. The photosynthetic rate was measured at 1500  $\mu\text{mol m}^{-2} \text{s}^{-1}$  to obtain the light-saturated rate of photosynthesis per leaf area ( $P_{\text{max}}$ ). The leaf temperature was adjusted to 25 °C and the CO<sub>2</sub> concentration was 380  $\mu\text{mol mol}^{-1}$ . Leaves were kept in the chamber for 10 min before the measurements. Because leaves were already photosynthesizing in the natural condition before the measurements, the changes in the stomatal conductance after clipping with the chamber were small, which was supported by the strong within-species correlation between  $P_{\text{max}}$  and nitrogen content per leaf area ( $N_{\text{area}}$ ) or chloroplast volume per leaf area (Oguchi et al. 2006). Each year, subsequent to photosynthesis measurements, three leaf discs (each 1 cm in diameter) were punched out of the leaf and dried at 80 °C in an oven for >3 days. After dry mass determination for calculating leaf mass per area (LMA), nitrogen content was determined using NC and element analysers (NC-80, Shimadzu, Kyoto, Japan and Vario EL III, Elementar Analysensysteme GmbH, Hanau, Germany).

### Growth analysis, mortality observation and plasticity evaluation

For all seedlings, height, stem diameter (two perpendicular measurements) at the ground level and the length of all branches were measured during every summer from 2002 to

2005. These measurements were conducted from July to early September. The stem diameter was measured repeatedly at the same position that was marked with a white pen at the base of the stem. The relative growth rate (RGR) was calculated as follows:

$$\text{RGR} = \left[ \ln(D_j^2 \times H_j) - \ln(D_i^2 \times H_i) \right] / (T_j - T_i) \quad (1)$$

where  $D$  is the diameter,  $H$  is the height of the seedlings,  $T$  is the time (year) and subscripts 'i' and 'j' indicate the 'i'th and 'j'th year, respectively. To repeatedly measure the data for the growth analysis using the same seedlings, small number-printed flags were planted close to each seedling. If no leaves were developed from the start of the growing season to the end of summer, such seedlings were considered to be dead. No seedlings lost all of its leaves to herbivores. Mortality was calculated as (Total number of dead seedlings from the gap formation to the end of each summer)/(Seedling number at the time of gap formation).

The extent of the response to gap formation, namely plasticity, was calculated as follows in each trait, as described in the previous studies (Aiba and Kohyama 1997, Weijschede et al. 2006):

$$\text{Plasticity} = \left( \frac{\text{the average value at the gap plots}}{\text{the average value at the control plots}} \right) - 1 \quad (2)$$

The all branch length including main stem divided by height of the seedling was used for the indicator of the branching characteristic of species (see Figure S3 available as Supplementary Data at *Tree Physiology Online*).

### Statistics

Statistical analyses were performed using the R software (ver. 3.1.1, available from <http://www.R-project.org>). The two-tailed  $t$ -test was used to test the effect of gap formation on  $P_{\text{max}}$ , LMA,  $N_{\text{area}}$  and all branch length per height. The two-way factorial ANOVA was used to test the effect of gap formation and species on  $P_{\text{max}}$ , LMA,  $N_{\text{area}}$  and canopy openness. The Pearson correlation test was performed to analyse the correlations among variables.

## Results

### Changes in environmental conditions

Subsequent to the gap formation during 2002, instantaneous relative PPFD under diffused sunlight increased from 1.77 to 10.6% and mean daily PPFD increased from 0.74 to 3.07 mol m<sup>-2</sup> day<sup>-1</sup> (Table 2). The average above-canopy daily PPFD from 19 July to 18 August 2002, observed at a flux tower near the plot, was 20.9 mol m<sup>-2</sup> day<sup>-1</sup>. On a sunny day, PPFD of the gap plots was approximately twofold greater than that of the control plots under diffuse sunlight and was >10-fold greater than that of the control plots when exposed to direct sunlight. The mean temperature

and mean vapour pressure deficit did not show a large change after gap formation; thus, we assumed that the increase in irradiance was the primary factor facilitating the photosynthetic acclimation and growth response (see Oguchi et al. 2006 and 2008 for details).

The fraction of open area in the canopy evaluated from the hemispherical photographs increased from 8 to 19% on average after the gap formation ( $P < 0.001$  in the two-way factorial ANOVA). There was no significant difference in the fraction of open area among species ( $P = 0.244$ ). Interaction between 'gap formation' and species for canopy openness was not significant either, as indicated by the two-way factorial ANOVA. The fraction of open area showed little change during 2003 and 2004, but increased during 2005 at the control plots, which was caused by the typhoon of 2004 (see Figure S2 available as Supplementary Data at *Tree Physiology* Online). As background information, the annual solar radiation obtained at a flux tower in the experimental forest showed little change from 2000 to 2008 (see Figure S4 available as Supplementary Data at *Tree Physiology* Online).

### Responses of leaf traits

Figure 1 shows the yearly change in the photosynthetic capacity ( $P_{\max}$ ) of the seedlings of the six deciduous trees species. The data in 2002 showed  $P_{\max}$  30 days after the gap formation. All species showed a statistically significant increase in  $P_{\max}$  at the gap plots, although the extent of the increase was similar among these species. In 2003, new leaves that developed under the gap condition showed significant variation in  $P_{\max}$  among the six species. *Magnolia obovata* showed the smallest increase in  $P_{\max}$  (24.2% with no statistical difference), whereas *Q. crispula* showed the largest increase (82.7%).  $P_{\max}$  for all species at the gap plots in 2004 and 2005 showed little difference from that in 2003, except for *K. pictus*. After the hit of the typhoon in 2004,  $P_{\max}$  for all species at the control plots increased in 2005.

Leaf mass per area and  $N_{\text{area}}$  of the six species showed similar responses to  $P_{\max}$  (Figures 2 and 3), suggesting that the acclimation responses of leaf morphology contributed to the increase in  $P_{\max}$  from the next year of the gap formation, although the increases in LMA and  $N_{\text{area}}$  were not as great as those in  $P_{\max}$  in many cases. Leaf mass per area and  $N_{\text{area}}$  of understorey seedlings also increased in 2005 when the understorey light intensity was increased by the typhoon. In 2009, LMA and  $N_{\text{area}}$  of the gap condition decreased to a level similar to that before the gap formation, which suggested that the light intensity at the gap understorey had been decreased by the growth of canopy and young trees, although the canopy gap remained incompletely closed.

### Responses of growth rates and the effects of photosynthetic acclimation

The seedlings of all six species showed higher RGRs at the gap than at the control plots (Figure 4). The extent of the increase in

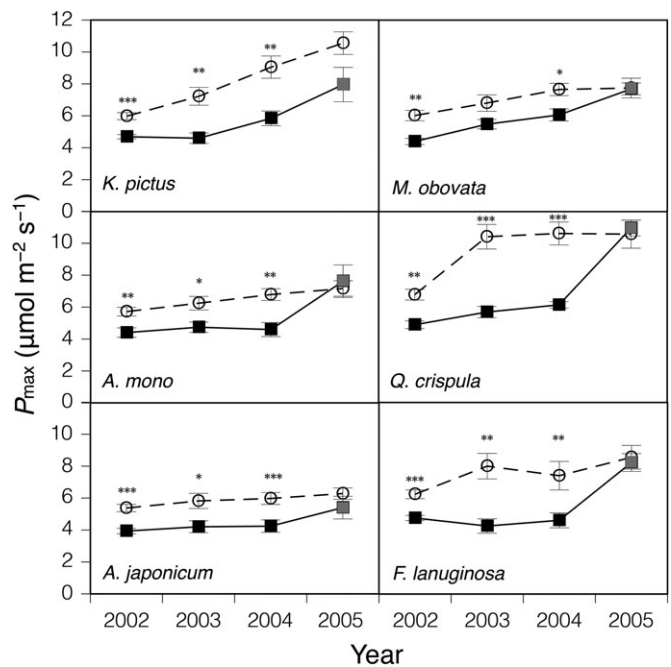

Figure 1. The change in light-saturated photosynthetic rate per leaf area ( $P_{\max}$ ) after the gap formation, which was carried out on 19 July 2002. Seedlings of six deciduous species growing naturally at the control (closed squares) and gap (open circles) plots were used. The measurements were conducted with only leaves that ceased expansion before the gap formation in 2002, and with the uppermost newly developed mature leaves from 2003 to 2005. Bars denote  $\pm$  standard error of the mean. \* $P < 0.05$ , \*\* $P < 0.01$ , \*\*\* $P < 0.001$ . In September 2004, a large typhoon hit the northern part of Japan, which resulted in an increase in light intensity, particularly at the control plots in 2005 (see Figure S1 available as Supplementary Data at *Tree Physiology* Online). The increase in  $P_{\max}$  at the control plots in 2005 (grey squares) would be because of the typhoon disturbance (see text for details). See text for the full scientific names of the materials.

RGR varied among the species and it was not significantly correlated to RGR at the control plots ( $P = 0.471$ ). At the gap plots, *Q. crispula* and *A. mono* showed the highest and the lowest RGR, respectively, and at the control plots, *M. obovata* and *A. japonicum* showed the highest and the lowest RGR, respectively.

When the control and the gap data were combined,  $P_{\max}$  in both 2002 and 2003 showed a significant correlation with RGR from 2002 to 2005 and from 2003 to 2005, respectively (Figure 5), although the correlation was not significant when the control and gap data were separated. The growth rates of the seedlings were better explained by  $P_{\max}$  of new leaves developed subsequent to gap formation than by  $P_{\max}$  of already developed leaves, which showed smaller gap response than the new leaves (Figure 1). Two fast-growing canopy tree species, *M. obovata* and *K. pictus*, were observed to show higher RGR than the other species when compared at the same  $P_{\max}$  (Figure 5b). As written in the previous section,  $P_{\max}$  in 2004 was similar to that in 2003, therefore the correlation between the average of  $P_{\max}$  from 2003 to 2004 and RGR from 2003 to 2005 was similar to the correlation between  $P_{\max}$  in 2003 and

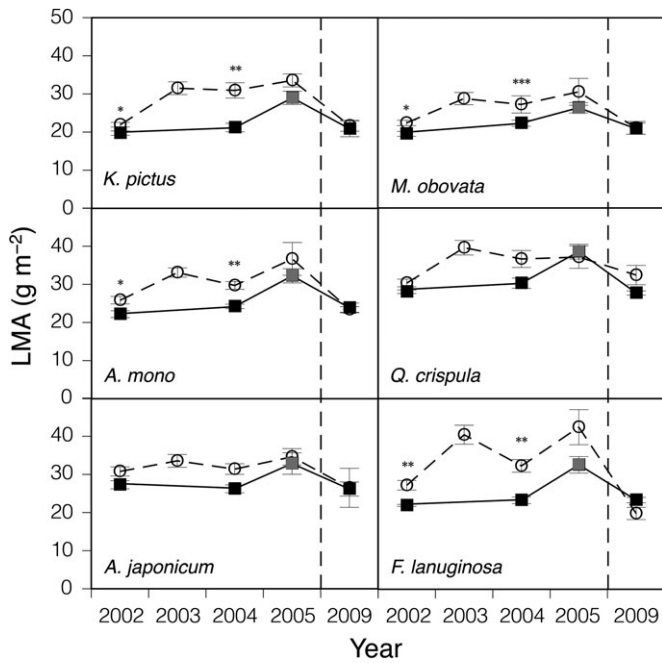

Figure 2. The change in LMA after the gap formation. Seedlings of six deciduous species naturally growing at the control (closed squares) and gap (open circles) plots were used. Bars denote  $\pm$  standard error of the mean. \* $P < 0.05$ , \*\* $P < 0.01$ , \*\*\* $P < 0.001$ . See legend of Figure 1 and text for details of leaves used and the full scientific names of the materials.

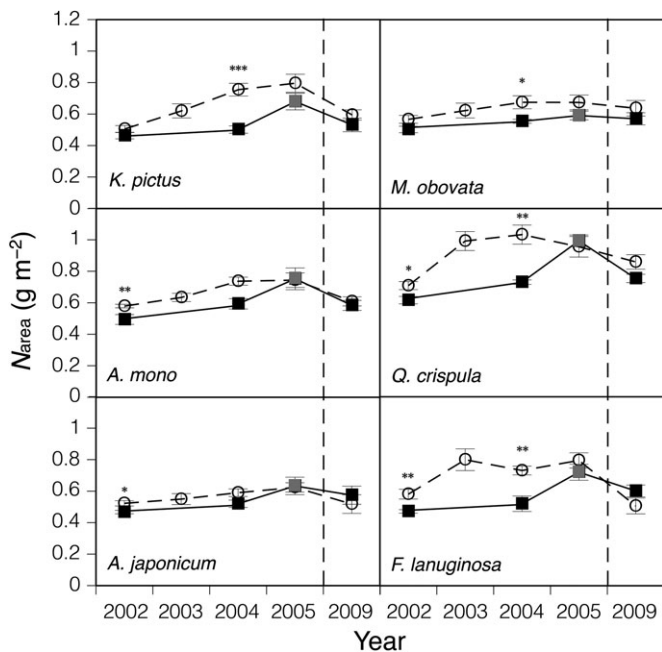

Figure 3. The change in nitrogen content per leaf area ( $N_{\text{area}}$ ) after the gap formation. Seedlings of six deciduous species growing naturally at the control (closed squares) and gap (open circles) plots were used. Bars denote  $\pm$  standard error of the mean. \* $P < 0.05$ , \*\* $P < 0.01$ , \*\*\* $P < 0.001$ . See legend of Figure 1 and text for details of used leaves and the full scientific names of the materials.

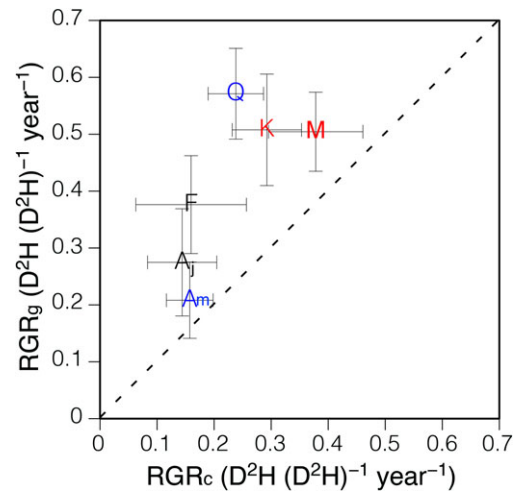

Figure 4. The relationship between relative growth rates (RGRs) of seedlings grown naturally at the gap plots (RGRg) and RGR of seedlings grown naturally at the control plots (RGRc) for six temperate deciduous tree species. Each point indicates a species mean and error bars denote the standard error. RGR was calculated from the change in  $D^2H$  from 2002 to 2005. The initials M, K, F, Aj, Q and Am indicate *Magnolia obovata*, *Kalopanax pictus*, *Fraxinus lanuginosa*, *Acer japonicum*, *Quercus crispula* and *Acer mono*, respectively. Red symbols, black symbols and blue symbols indicate fast-growing canopy tree species, sub-canopy tree species and dominant canopy tree species, respectively. The dashed line indicates  $Y = X$  line.

RGR from 2003 to 2005 (see Figure S5 available as Supplementary Data at *Tree Physiology* Online).

As expected from the strong correlation between RGR and  $P_{\text{max}}$ , the extent of the increase in RGR following gap formation was strongly correlated with the plasticity of  $P_{\text{max}}$  across the species (Figure 6,  $P = 0.012$ ). It should be also noted that the relationship between RGR and  $P_{\text{max}}$  plasticities in all species was close to a ratio of 1:1, except for *Q. crispula*.

### Mortality of seedlings

The 8-year observation of the mortality showed that the fast-growing canopy trees, *M. obovata* and *K. pictus*, had the lowest and the third lowest mortality, respectively, in the control plots (Figure 7). All seedlings of these fast-growing canopy species survived in the gap plots. In the dominant canopy trees, *A. mono* showed the second lowest mortality, while *Q. crispula* showed the highest mortality in the understorey. Both species showed a low mortality in gap plots. *Fraxinus lanuginosa* and *A. japonicum*, the sub-canopy trees, showed a moderate mortality in the control plots and only *A. japonicum* showed a moderate mortality in gap plots. The correlations between all the measured variables and 8-year mortality are shown in Table 3. The extent of the increase in  $P_{\text{max}}$  and RGR caused by gap formation significantly correlated with the 8-year mortality at the control plots (Figure 8), and such a correlation was not observed in the mortality at the gap plots. Leaf mass per area and  $N_{\text{area}}$  of the leaves grown in gap plots in 2003 were also significantly correlated with the mortality at control plots.

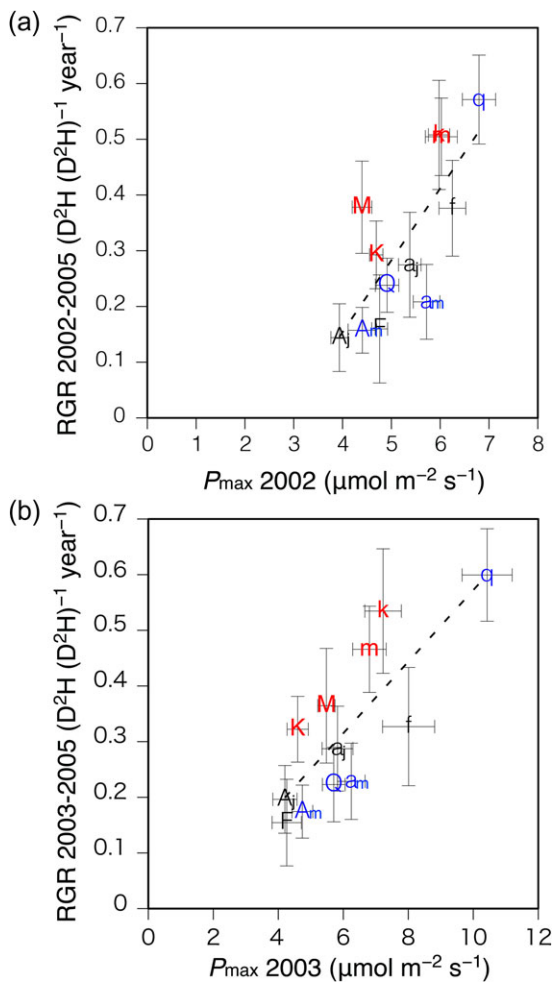

Figure 5. Relationship between light-saturated photosynthetic rate ( $P_{\max}$ ) at 2002 and relative growth rate (RGR) from 2002 to 2005 (a), and relationship between  $P_{\max}$  at 2003 and RGR from 2003 to 2005 (b), among six tree species grown at control plots (capital letter symbols) and gap plots (small letter symbols). Error bars denote the standard error. The initials M, K, F, Aj, Q and Am indicate *Magnolia obovata*, *Kalopanax pictus*, *Fraxinus lanuginosa*, *Acer japonicum*, *Quercus crispula* and *Acer mono*, respectively. Red symbols, black symbols and blue symbols indicate fast-growing canopy tree species, sub-canopy tree species and dominant canopy tree species, respectively. Regression lines: (a)  $Y = 0.129X - 0.362$ ,  $r^2 = 0.585$ ,  $P = 0.003$ ; (b)  $Y = 0.0643X - 0.0709$ ,  $r^2 = 0.645$ ,  $P = 0.002$ .

## Discussion

### The effect of photosynthetic light acclimation on subsequent growth

During 2002, the year of the gap formation, the already developed leaves of the seedlings increased their  $P_{\max}$  by 27–38% (Figure 1). In contrast, newly developed leaves in the year following gap formation increased their  $P_{\max}$  by 24–83%. The main reason for the smaller acclimation capacity of the already developed leaves as compared with the newly developed leaves may be the low plasticity of leaf anatomy in matured leaves (Sims and Pearcy 1992, Yamashita et al. 2002, Oguchi et al. 2003, 2006);

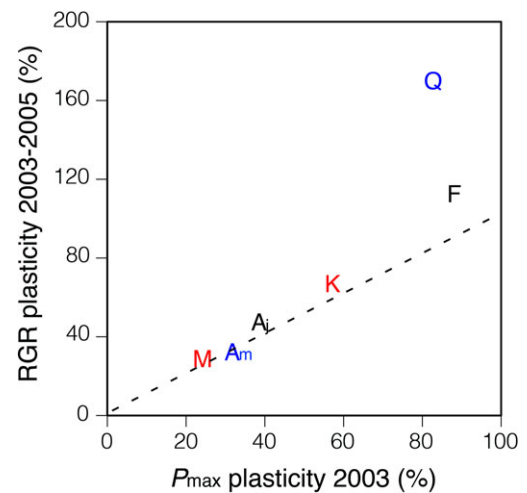

Figure 6. Relationship between plasticity of relative growth rates (RGRs) and plasticity of light-saturated photosynthetic rate ( $P_{\max}$ ) for six temperate deciduous tree species. Plasticity was calculated from the extent of the increase in each trait of the seedlings in response to the gap formation. Each point indicates a species mean. RGR was calculated from the change in  $D^2H$ . The initials M, K, F, Aj, Q and Am indicate *Magnolia obovata*, *Kalopanax pictus*, *Fraxinus lanuginosa*, *Acer japonicum*, *Quercus crispula* and *Acer mono*, respectively. Red symbols, black symbols and blue symbols indicate fast-growing canopy tree species, sub-canopy tree species and dominant canopy tree species, respectively. The dashed line indicates  $Y = X$  line.

to increase in their photosynthetic capacity, leaves are required to increase their thickness and mesophyll cell surface area for increasing the space available for chloroplasts, which require  $\text{CO}_2$  from the intercellular space (Evans et al. 1994, Terashima et al. 2001, Oguchi et al. 2005, Terashima et al. 2011).  $P_{\max}$  of the gap seedlings during the subsequent years in 2004 and 2005 was similar to those in 2003, suggesting that the photosynthetic capacity had been fully acclimated to the gap condition in the second year following the gap formation. Only for *K. pictus*, leaves may not have fully acclimated by 2003. This suggests that the timing of the influence of light environment on leaf developmental events may be variable among species as reported by Uemura et al. (2000).

The RGR from 2002 to 2005 varied among species, both at the control understorey and at the gap plots (Figure 4). There has been a debate about the relationship between RGRs in shade and in sun (Kitajima 1994, Sack and Grubb 2001, 2003, Kitajima and Bolker 2003). For example, Kitajima (1994) showed a strong positive relationship between RGR in shade and RGR in sun among 13 tropical tree species, whereas Agyeman et al. (1999) showed an opposite trend in 16 tropical tree species. In the present study, the relationship was not significant, which is also different from these previous reports. These differences could be explained partly by differences in the experimental conditions. For instance, the present study used seedlings of deciduous species, aged 2–10 years old, coexisting in a cool-temperate deciduous forest, whereas Kitajima (1994) used current-year seedlings of both deciduous and



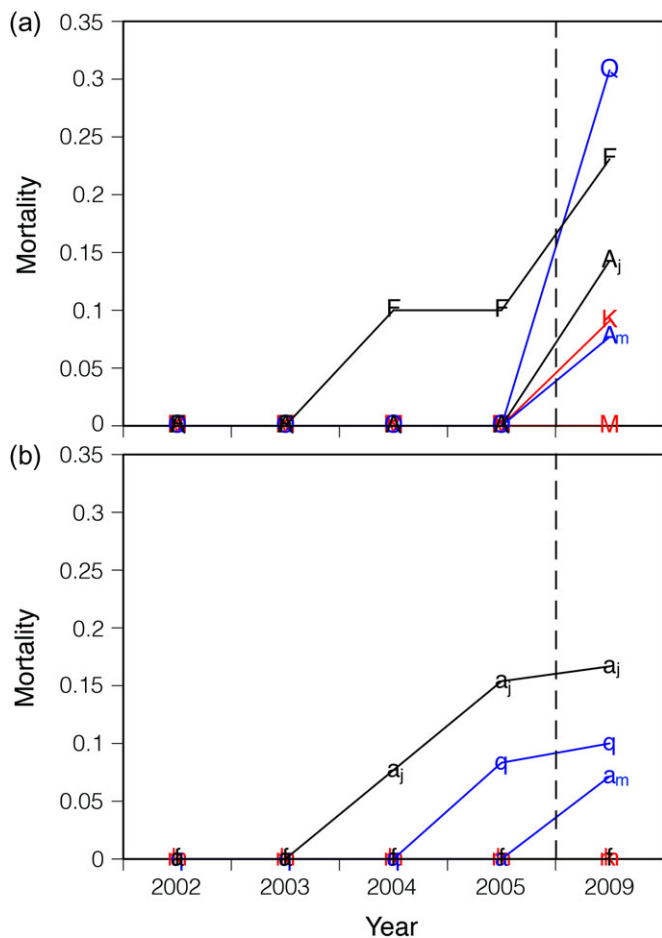

Figure 7. The change in mortality of seedlings from the gap formation at 2002 to 2009. Naturally growing seedlings of six temperate deciduous tree species at the control plots (a) and gap plots (b) were used. The initials M, K, F, Aj, Q and Am indicate *Magnolia obovata*, *Kalopanax pictus*, *Fraxinus lanuginosa*, *Acer japonicum*, *Quercus crispula* and *Acer mono*, respectively. Red symbols, black symbols and blue symbols indicate fast-growing canopy tree species, sub-canopy tree species and dominant canopy tree species, respectively.

evergreen species in tropical forests. Seedlings of evergreen species often show lower growth rates and smaller growth responses to changes in light availability than seedlings of deciduous species (Reich et al. 1992, Cornelissen et al. 1996, Walters and Reich 1999), therefore, the low RGR and low responses of the young seedlings of such evergreen species would have resulted in a stronger correlation. In Agyeman et al. (1999), the growth light conditions were 2, 6, 10, 28, 44 and 66% of full sun, some of which were considerably higher than that of the gap site of the present study (10.6%). This difference in the light intensity of the high light condition may have caused different responses especially in shade-tolerant species, which tend to show large non-photochemical quenching and photoinhibition in high light conditions. Changes in canopy cover also involve changes in light quality, humidity and temperature, which may have played a role in the different responses among the

Table 3. Correlation coefficients of the relationships between the 8-year mortality of the seedlings and values of the parameters at control plots (Control), values of the parameters at gap plots (Gap) and the response of the parameters to gap formation (Plasticity). Statistically significant correlations with the Pearson correlation test ( $P < 0.05$ ) are shown in bold.

|                                    | Control      | Gap          | Plasticity   |
|------------------------------------|--------------|--------------|--------------|
| Against mortality in control plots |              |              |              |
| Mortality                          | –            | 0.317        | –0.498       |
| $P_{\max}$                         | 0.056        | 0.781        | <b>0.885</b> |
| RGR                                | –0.594       | 0.259        | <b>0.937</b> |
| LMA                                | 0.709        | <b>0.943</b> | 0.132        |
| $N_{\text{area}}$                  | 0.582        | <b>0.835</b> | 0.796        |
| Branching                          | 0.231        | 0.178        | –0.047       |
| Against mortality in gap plots     |              |              |              |
| Mortality                          | 0.317        | –            | 0.555        |
| $P_{\max}$                         | –0.109       | –0.088       | –0.130       |
| RGR                                | –0.458       | –0.264       | 0.076        |
| LMA                                | <b>0.877</b> | 0.155        | –0.811       |
| $N_{\text{area}}$                  | 0.246        | –0.028       | –0.298       |
| Branching                          | <b>0.831</b> | <b>0.858</b> | 0.159        |

Mortality was calculated as (Total number of dead seedlings from the gap formation to the end of summer 2009)/(Seedling number at the time of gap formation in 2002).  $P_{\max}$  means the light-saturated rate of photosynthesis per leaf area in 2003. Relative growth rate (RGR) was calculated from the change in  $D^2H$  from 2003 to 2005. For leaf mass per area (LMA) and nitrogen content per leaf area ( $N_{\text{area}}$ ), values of plants in control plots in 2002 were used for Control and values of plants in gap plots in 2003 were used for Gap. Branching values were calculated as (all branch length including main stem)/(height of the seedling) using the values in 2003. Plasticity was calculated as (Gap value/Control value) – 1.

studies. In the present study, the independency of RGR in the gap from RGR in the control suggests that the variation of the gap response of RGR was caused by the different dependencies of their growth on gap formation among the deciduous species, namely the different strategies between gap-demanding and gap-independent species.

To see the effect of the acclimation of photosynthetic capacity on the subsequent growth rate, RGR from 2002 to 2005 and RGR from 2003 to 2005 were plotted against  $P_{\max}$  in 2002 and 2003, respectively (Figure 5). Although RGR showed no correlation with  $P_{\max}$  when we see only the understorey, it showed a strong correlation with  $P_{\max}$  when the control and gap data were combined. The lack of correlation between RGR and  $P_{\max}$  in the understorey suggests that the growth rate of the seedlings in the understorey of cool-temperate deciduous forests can be strongly affected by morphological traits such as LAR rather than physiological traits such as net assimilation rate (growth rate per leaf area), as has been shown in previous studies (Cornelissen et al. 1996, Reich et al. 1998). In the present study, the two fast-growing canopy tree species showed less branching than the other species, i.e., the ratio of all branch lengths per height was in the range of 1.07–1.32 in these two species and 1.54–2.46 in the other species (see Figure S3 available as

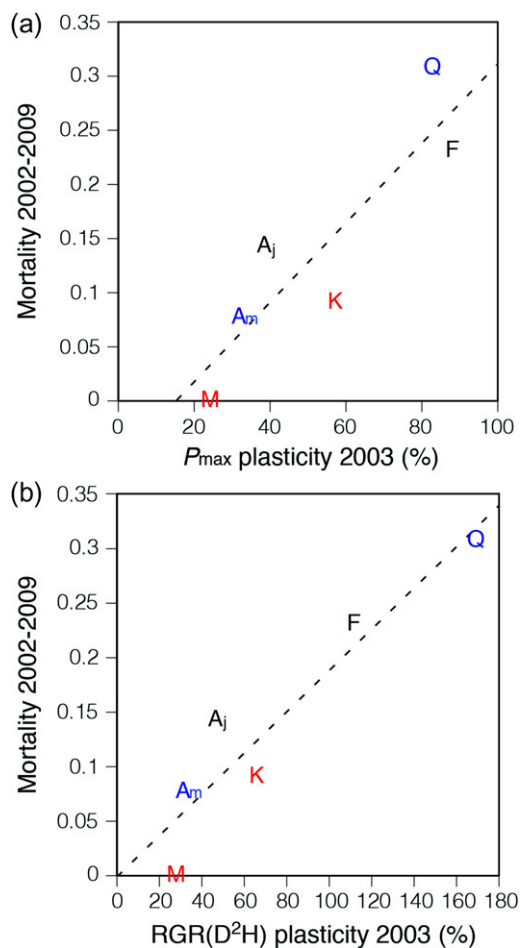

Figure 8. Relationship between mortality at the control plots from 2002 to 2009 and plasticity of light-saturated photosynthetic rate ( $P_{\max}$ , a) or plasticity of relative growth rates (RGRs) (b) for six temperate deciduous tree species. Plasticity was calculated from the extent of the increase in each trait of the seedlings in response to the gap formation. Each point indicates a species mean. RGR was calculated from the change in  $D^2H$ . See legend of Figure 7 for the meaning of the initials used for the symbol (species names) and the meaning of the colours of the initials (life forms). Regression lines: (a)  $Y = 0.00367X - 0.0558$ ,  $r^2 = 0.783$ ,  $P = 0.019$ ; (b)  $Y = 0.00189X + 0.00105$ ,  $r^2 = 0.875$ ,  $P = 0.006$ .

Supplementary Data at *Tree Physiology* Online). It should also be noted that the two species showed the highest SLA values (the lowest LMA) among the six species (Figure 2). It is likely that these morphological differences resulted in a higher RGR in the two fast-growing canopy tree species when compared at the same photosynthetic capacity, which may have broken the correlation between RGR and  $P_{\max}$  in the understorey. The strong correlation between RGR and  $P_{\max}$  in the combined data of gap and understorey indicates that the growth of seedlings is strongly limited by the photosynthetic capacity during the forest succession process via gap formation and thus acclimation of both already expanded leaves and newly developed leaves after gap formation contributed to the stimulation of RGR. As discussed above, the variations in leaf lifespan and LMA among deciduous species, coexisting in cool-temperate deciduous

forests, are considerably smaller than those among tropical species. Therefore, the variation in RGR resulting from the morphological differences among species is small, which would be one of the explanations as to why the light acclimation of photosynthetic capacity strongly affects the growth rate after gap formation in deciduous species coexisting in cool-temperate forests. Although the photosynthetic plasticity also varies among tropical and subtropical species (Popma and Bongers 1991, Yamashita et al. 2002), this effect on the variation of RGR may be masked by the large difference in RGR caused by the wide range of leaf lifespan and LMA among the tropical species.

The extent of the increase in RGR was strongly correlated with the extent of the increase in  $P_{\max}$  (Figure 6), even though these data included the two fast-growing canopy tree species, which showed a higher RGR when compared at the same photosynthetic capacity in Figure 5b. These results indicate that the growth of the seedlings subsequent to gap formation are strongly affected by photosynthetic plasticity in response to gap formation. In the species that showed large plasticity in  $P_{\max}$ , especially in *Q. crispula*, the extent of the plasticity in RGR was larger than the extent of plasticity in  $P_{\max}$ . This might suggest that the larger stimulation of photosynthetic rate resulted in the larger enhancement of height growth and thus the asymmetric advantage in competition for light. This would be a valuable report to show the strong effect of the early response of the photosynthesis capacity to gap formation on the subsequent growth rate of the understorey seedlings, which was conducted under the natural cool-temperate deciduous forest condition.

### Life forms and the gap response capacity

The correlations between the life forms of species and plasticity in response to environmental heterogeneity have been discussed in previous studies on tree regeneration in forests (Cai et al. 2005, Ruger et al. 2012). For example, it has been hypothesized that taller tree species are more likely to experience large irradiance changes during their life cycle, so that they should exhibit greater light response (Rozendaal et al. 2006). Intrinsic growth rates were also reported to be correlated with light response (Ruger et al. 2012). In the present study, *M. ovobata* and *K. pictus*, known as fast-growing canopy tree species (Yamamoto 1989, Cao and Ohkubo 1998), both showed less branching and a higher RGR when compared at the same photosynthetic capacity (see Figure S3 available as Supplementary Data at *Tree Physiology* Online and Figure 5), but their gap responses in RGR and  $P_{\max}$  were slightly different from each other (Figure 6). The smallest gap response of *M. ovobata* in the present study indicated the smallest dependence of their growth on gap formation, whereas a relatively large gap response of *K. pictus* indicated a relatively large dependency. Although both species employ the same strategy to achieve a high RGR using orthotropic branching characteristics, thereby providing priority to height growth rates at the sacrifice of horizontal branching,

their gap dependencies may be different from each other. *Quercus crispula* and *A. mono*, known as the dominant canopy tree species in cool-temperate forests (Koike 1988, Umeki 2001), showed a remarkably different response to the gap formation. A small gap response of *A. mono* in  $P_{\max}$  and RGR indicates a strategy of slow but consistent growth in the forest understorey, whereas a large response of *Q. crispula* indicates a strategy of strong growth reliance on gap formation. The sub-canopy species, *A. japonicum* and *F. lanuginosa*, also showed contrasting responses. *Acer japonicum* showed a similar response to *A. mono*, whereas *F. lanuginosa* showed a large increase in  $P_{\max}$  and RGR in response to gap formation. These sub-canopy species do not reach the canopy level (Hara 1985, Ishida and Hiura 1998, Nabeshima and Hiura 2008), thus do not require the gap space for expanding their branches in the canopy level. However, if gap formation occurs, some species may acclimate photosynthetic capacity to utilize the increased irradiance for carbon gain, but some species may not. These results indicate that the gap dependency and gap response capacity vary among species, even within the same life form, particularly in cool-temperate deciduous forests.

#### The effect of the typhoon during the autumn of 2004

After the impact of the typhoon during autumn 2004, the photosynthetic capacity, LMA and  $N_{\text{area}}$  of seedlings at control plots increased to the same level as the gap plots (Figures 2–4). Although the typhoon did not cause the falling of canopy trees at the studied site, it caused disturbances such as branch and leaf falling, which resulted in an increase in irradiance at control plots and the acclimation of seedlings to the increase in light availability (see Figure S2 available as Supplementary Data at *Tree Physiology* Online). This would be a good example to illustrate that the formation of small gaps significantly affects the growth of understorey seedlings, even without the falling of a canopy tree. It was also observed that the falling of branches and leaves hit and covered the understorey seedlings. Therefore, this physical damage may have affected the 8-year seedling mortality (observed in 2009), although it did not result in a drastic increase in the mortality soon after the typhoon (2005) especially in the control plots (Figure 1). Recent meta-analyses indicated that morphological leaf traits such as LMA correlate with the toughness of leaves and woods (Wright et al. 2010, Onoda et al. 2011). These morphological leaf traits may also be important for survivorship in the understorey, particularly against the physical damage caused by typhoons, although the correlation between LMA and survivorship in the understorey was not strong in the present study (Table 3).

#### A trade-off between the photosynthetic plasticity and the understorey survivorship

As we suggested in the hypothesis, both the extent of the increase in  $P_{\max}$  and RGR in response to the gap formation

showed a significant correlation with the 8-year mortality of seedlings at the control understorey (Figure 8). This result suggests a trade-off relationship between the long-term survivorship of understorey seedlings and their photosynthetic plasticity in response to gap formation among the species coexisting in a temperate deciduous forest, which is supported by the previous reports in which a correlation between mortality under a shaded condition and the percentage increase in the growth rate from shaded to exposed conditions was observed among saplings of multiple woody species (Grubb et al. 1996, Aiba and Kohyama 1997). The existence of the trade-off suggests the existence of some costs involved in the photosynthetic plasticity, which can increase the mortality of seedlings in the understorey. Because of this cost, some species may not possess a high photosynthetic plasticity, and thus the photosynthetic plasticity varies among species, although the plasticity does improve the growth of seedlings if gap formation occurs. Based on the results of the present study, a discussion of the physiological mechanism underlying the high plasticity of the photosynthetic capacity resulting in the low survivorship at the understorey would present a challenge. Unlike the acclimation of leaves developed before the increase in irradiance (Oguchi et al. 2003, 2005), newly developed leaves after gap formation are able to control the construction cost of leaves after sensing the new environments. This means such construction cost for the high photosynthetic capacity is not required before gap formation; thus, it is not regarded as the cost of plasticity. Rather, costs of information acquisition or developmental instability (noise) may be involved in the photosynthetic plasticity (DeWitt et al. 1998). However, the current knowledge about the physiological and genetic mechanisms in the differentiation of sun and shade leaves depending on light intensity is still scarce, even in herbal model species (Yano and Terashima 2001, Lambers et al. 2008, Tan et al. 2008, Munekage et al. 2015). Progress in the elucidation of the differentiation mechanism by physiological and molecular biological approaches would be needed to understand the cost of photosynthetic plasticity more deeply. On the other hand, it can be also said that the correlation between the plasticity and mortality may result from the variation in strategies among species pertaining to growth and survival in the forest understorey. For example, previous studies indicated that allocation to carbon and nutrients storage is important for the survival of seedlings (Coley et al. 1985, Coley 1988, 1993) and that the survivorship in low-light conditions negatively correlates with the growth rates in high-light conditions (Kobe et al. 1995); therefore, the species with a strategy to store carbon and nutrients may not allocate carbon and nutrients for the acclimation of leaves even in the gap condition. This might have caused the correlation between the 8-year mortality in control condition and LMA and  $N_{\text{area}}$  of leaves grown in the gap condition (Table 3).

Phenotypic plasticity is considered to greatly contribute to species fitness (Schlichting and Pigliucci 1995) and to express the

conceptual strategy employed by species, including gap dependency in the regeneration niche (Valladares et al. 2000). The trade-off relationship between  $P_{\max}$  or RGR plasticity and understorey survivorship, combined with the correlation between the RGR plasticity and  $P_{\max}$  plasticity, should support this suggestion. The plasticity of  $P_{\max}$  strongly indicated the gap dependency of the species. This is equivalent to the idea of trait-based approaches: a relatively measurable trait can indicate the conceptual strategy (Westoby and Wright 2006). At least in cool-temperate deciduous forests, by measuring  $P_{\max}$  plasticity, an estimate of the reliance of growth of a species on gap formation could be obtained, which usually requires a long-duration study of population dynamics of understorey and gap seedlings. Lusk and DelPozo (2002) found that mortality rates under low light ( $12 \mu\text{mol m}^{-2} \text{s}^{-1}$ ) had a strong positive correlation with photosynthetic capacity ( $P = 0.004$ ) and the light compensation point ( $P = 0.005$ ) of seedlings grown under high light ( $150 \mu\text{mol m}^{-2} \text{s}^{-1}$ ) among 12 angiosperm trees in a Chilean temperate rainforest. However, in the present study, the photosynthetic capacity under the gap condition did not show a significant correlation with the mortality in the understorey. The measurement of the photosynthetic capacity under both gap and shade conditions to evaluate the photosynthetic plasticity would be a more reliable method to estimate the gap dependency of species. The accuracy of the estimation of gap dependency would be improved when phenotypic plasticity of a larger number of measurable traits is compared among species (Valladares et al. 2000).

## Conclusion

Among the understorey seedlings in the cool-temperate deciduous forest, the stimulation of RGR after gap formation was strongly correlated with change in photosynthetic capacity of newly expanded leaves. This indicates that interspecific differences in the photosynthetic response contributed to the variation in growth responses after gap formation. The enhancement of RGR and photosynthetic capacity correlated with mortality in the understorey, which suggests a trade-off between the gap response capacity and understorey shade tolerance. These results indicate that the variation in photosynthetic plasticity among species contributes to species coexistence in forests through tree regeneration.

## Acknowledgments

We wish to thank the staff members at Tomakomai Experimental Forest for their technical support and the experimental set-up, T. Koike and T. Kohyama for generous offer of instruments and E. Nabeshima, S. Kitaoka, S. Kosuge, S. Takahashi and Y. Miyazaki for experimental supports, advice and discussion. We also thank the constructive comments from the editor and the referees.

## Supplementary Data

Supplementary Data for this article are available at *Tree Physiology* Online.

## Conflict of interest

None declared.

## Funding

This work was financially supported in part by JSPS Research Fellowship for Young Scientists (16-03330 to R.O.).

## References

- Agyeman VK, Swaine MD, Thompson J (1999) Responses of tropical forest tree seedlings to irradiance and the derivation of a light response index. *J Ecol* 87:815–827.
- Aiba SI, Kohyama T (1997) Crown architecture and life-history traits of 14 tree species in a warm-temperate rain forest: significance of spatial heterogeneity. *J Ecol* 85:611–624.
- Bazzaz FA (1979) The physiological ecology of plant succession. *Annu Rev Ecol Syst* 10:351–371.
- Bazzaz FA, Carlson RW (1982) Photosynthetic acclimation to variability in the light environment of early and late successional plants. *Oecologia* 54:313–316.
- Beckage B, Clark JS (2003) Seedling survival and growth of three forest tree species: the role of spatial heterogeneity. *Ecology* 84:1849–1861.
- Bell DL, Galloway LF (2008) Population differentiation for plasticity to light in an annual herb: adaptation and cost. *Am J Bot* 95:59–65.
- Björkman O (1981) Responses to different quantum flux densities. In: Lange OL, Nobel PS, Osmond CB, Ziegler H (eds) *Physiological Plant Ecology I, Responses to the Physical Environment*. Encyclopedia of plant physiology, new series, Vol. 12A. Springer-Verlag, Berlin, pp 57–107.
- Boardman NK (1977) Comparative photosynthesis of sun and shade plants. *Annu Rev Plant Physiol* 28:355–377.
- Bungard RA, Press MC, Scholes JD (2000) The influence of nitrogen on rain forest dipterocarp seedlings exposed to a large increase in irradiance. *Plant Cell Environ* 23:1183–1194.
- Cai ZQ, Rijkers T, Bongers F (2005) Photosynthetic acclimation to light changes in tropical monsoon forest woody species differing in adult stature. *Tree Physiol* 25:1023–1031.
- Canham CD (1988) Growth and canopy architecture of shade-tolerant trees - response to canopy gaps. *Ecology* 69:786–795.
- Cao KF, Ohkubo T (1998) Allometry, root/shoot ratio and root architecture in understorey saplings of deciduous dicotyledonous trees in central Japan. *Ecol Res* 13:217–227.
- Chazdon RL (1992) Photosynthetic plasticity of two rain forest shrubs across natural gap transects. *Oecologia* 92:586–595.
- Clinton BD (2003) Light, temperature, and soil moisture responses to elevation, evergreen understorey, and small, canopy gaps in the southern Appalachians. *For Ecol Manage* 186:243–255.
- Coley PD (1988) Effects of plant-growth rate and leaf lifetime on the amount and type of anti-herbivore defense. *Oecologia* 74:531–536.
- Coley PD (1993) Gap size and plant defenses. *Trends Ecol Evol* 8:1–2.
- Coley PD, Bryant JP, Chapin FS (1985) Resource availability and plant antiherbivore defense. *Science* 230:895–899.



- Cornelissen JHC, Diez PC, Hunt R (1996) Seedling growth, allocation and leaf attributes in a wide range of woody plant species and types. *J Ecol* 84:755–765.
- Dechaine JM, Johnston JA, Brock MT, Weinig C (2007) Constraints on the evolution of adaptive plasticity: costs of plasticity to density are expressed in segregating progenies. *New Phytol* 176:874–882.
- Denslow JS (1987) Tropical rainforest gaps and tree species diversity. *Annu Rev Ecol Syst* 18:431–451.
- Denslow JS, Ellison AM, Sanford RE (1998) Treefall gap size effects on above- and below-ground processes in a tropical wet forest. *J Ecol* 86: 597–609.
- Denslow JS, Schultz JC, Vitousek PM, Strain BR (1990) Growth-responses of tropical shrubs to treefall gap environments. *Ecology* 71:165–179.
- DeWitt TJ, Sih A, Wilson DS (1998) Costs and limits of phenotypic plasticity. *Trends Ecol Evol* 13:77–81.
- Dorn LA, Pyle EH, Schmitt J (2000) Plasticity to light cues and resources in *Arabidopsis thaliana*: testing for adaptive value and costs. *Evolution* 54:1982–1994.
- Einhorn KS (2007) Growth and photosynthesis of ash *Fraxinus excelsior* and beech *Fagus sylvatica* seedlings in response to a light gradient following natural gap formation. *Ecol Bull* 52:147–165.
- Ellenberg H (1939) Über Zusammensetzung, Standort und Stoffproduktion bodenfeuchter Eichen- und Buchen-Mischwaldgesellschaften Nordwestdeutschlands. *Mitt Florist Soziol Arbeitsgem Niedersachsen* 5:3–135.
- Evans JR, von Caemmerer S, Satchell BA, Hudson GS (1994) The relationship between CO<sub>2</sub> transfer conductance and leaf anatomy in transgenic tobacco with a reduced content of rubisco. *Aust J Plant Physiol* 21:475–495.
- Fujimoto S, Motai T (1981) An analysis of growth and form for tree seedlings in a natural forest. In: Igarashi T (ed) Some analyses of community structure and regeneration for natural forests in Hokkaido. Hokkaido Forestry Service, Sapporo, pp 123–141.
- Grime JP (1979) Plant strategies and vegetation processes. John Wiley & Sons, Ltd, Chichester-NewYork-Brisbane-Toronto.
- Grubb PJ, Lee WG, Kollmann J, Wilson JB (1996) Interaction of irradiance and soil nutrient supply on growth of seedlings of ten European tall-shrub species and *Fagus sylvatica*. *J Ecol* 84:827–840.
- Hara M (1985) Forest response to gap formation in a climax beech forest. *Jpn J Ecol* 35:337–343.
- Hikosaka K, Terashima I (1995) A model of the acclimation of photosynthesis in the leaves of C-3 plants to sun and shade with respect to nitrogen use. *Plant Cell Environ* 18:605–618.
- Hiura T (1995) Gap formation and species diversity in Japanese beech forests: a test of the intermediate disturbance hypothesis on a geographic scale. *Oecologia* 104:265–271.
- Hiura T (2001) Stochasticity of species assemblage of canopy trees and understorey plants in a temperate secondary forest created by major disturbances. *Ecol Res* 16:887–893.
- Hiura T, Sano J, Konno Y (1996) Age structure and response to fine scale disturbances of *Abies sachalinensis*, *Picea jezoensis*, *Picea glehnii*, and *Betula ermanii* growing under the influence of a dwarf bamboo understorey in northern Japan. *Can J Forest Res* 26:289–297.
- Hoshino D, Nishimura N, Yamamoto S (2003) Effects of canopy conditions on the regeneration of major tree species in an old-growth *Chamaecyparis obtusa* forest in central Japan. *For Ecol Manage* 175: 141–152.
- Ishida K, Hiura T (1998) Pollen fertility and flowering phenology in an androdioecious tree, *Fraxinus lanuginosa* (Oleaceae), in Hokkaido, Japan. *Int J Plant Sci* 159:941–947.
- Kitajima K (1994) Relative importance of photosynthetic traits and allocation patterns as correlates of seedling shade tolerance of 13 tropical trees. *Oecologia* 98:419–428.
- Kitajima K, Bolker BM (2003) Testing performance rank reversals among coexisting species: crossover point irradiance analysis by Sack & Grubb (2001) and alternatives. *Funct Ecol* 17:276–281.
- Kobe RK, Pacala SW, Silander JA, Canham CD (1995) Juvenile tree survivorship as a component of shade tolerance. *Ecol Appl* 5:517–532.
- Koike T (1988) Leaf structure and photosynthetic performance as related to the forest succession of deciduous broad-leaved trees. *Plant Species Biol* 3:77–87.
- Krause GH, Koroleva OY, Dalling JW, Winter K (2001) Acclimation of tropical tree seedlings to excessive light in simulated tree-fall gaps. *Plant Cell Environ* 24:1345–1352.
- Lambers H, Chapin FS III, Pons TL (2008) Plant physiological ecology. Springer-Verlag, New York, NY.
- Langenheim JH, Osmond CB, Brooks A, Ferrar PJ (1984) Photosynthetic responses to light in seedlings of selected Amazonian and Australian rainforest tree species. *Oecologia* 63:215–224.
- Loach K (1967) Shade tolerance in tree seedlings. I. Leaf photosynthesis and respiration in plants raised under artificial shade. *New Phytol* 66: 607–621.
- Loach K (1970) Shade tolerance in tree seedlings. II. Growth analysis of plants raised under artificial shade. *New Phytol* 69:273–286.
- Lovelock CE, Kursar TA, Skillman JB, Winter K (1998) Photoinhibition in tropical forest understorey species with short- and long-lived leaves. *Funct Ecol* 12:553–560.
- Lusk CH, Del Pozo A (2002) Survival and growth of seedlings of 12 Chilean rainforest trees in two light environments: gas exchange and biomass distribution correlates. *Aust Ecol* 27:173–182.
- Maeno H, Hiura T (2000) The effect of leaf phenology of overstorey trees on the reproductive success of an understorey shrub, *Staphylea bumal-da* DC. *Can J Bot* 78:781–785.
- Masaki T, Tanaka H, Tanouchi H, Sakai T, Nakashizuka T (1999) Structure, dynamics and disturbance regime of temperate broad-leaved forests in Japan. *J Veg Sci* 10:805–814.
- Mooney HA, Gulmon GL (1979) Environmental and evolutionary constraints on the photosynthetic characteristics of higher plants. In: Solbrig OT, Jain S, Johnson GB, Raven PH (eds) Topics in plant population biology. Columbia University Press, New York, NY, pp 316–337.
- Mulkey SS, Percy RW (1992) Interactions between acclimation and photoinhibition of photosynthesis of a tropical forest understorey herb, *Alocasia macrorrhiza*, during simulated canopy gap formation. *Funct Ecol* 6:719–729.
- Munekage YN, Inoue S, Yoneda Y, Yokota A (2015) Distinct palisade tissue development processes promoted by leaf autonomous signalling and long-distance signalling in *Arabidopsis thaliana*. *Plant Cell Environ* 38:1116–1126.
- Nabeshima E, Hiura T (2004) Size dependency of photosynthetic water- and nitrogen-use efficiency and hydraulic limitation in *Acer mono*. *Tree Physiol* 24:745–752.
- Nabeshima E, Hiura T (2008) Size-dependency in hydraulic and photosynthetic properties of three *Acer* species having different maximum sizes. *Ecol Res* 23:281–288.
- Naidu SL, Delucia EH (1997a) Acclimation of shade-developed leaves on saplings exposed to late-season canopy gaps. *Tree Physiol* 17: 367–376.
- Naidu SL, Delucia EH (1997b) Growth, allocation and water relations of shade-grown *Quercus rubra* L. saplings exposed to a late-season canopy gap. *Ann Bot* 80:335–344.
- Naidu SL, Delucia EH (1998) Physiological and morphological acclimation of shade-grown tree seedlings to late-season canopy gap formation. *Plant Ecol* 138:27–40.
- Naka K (1982) Community dynamics of evergreen broadleaf forests in Southwestern Japan. 1. Wind damaged trees and canopy gaps in an Evergreen Oak Forest. *Bot Mag Tokyo* 95:385–399.

- Nakashizuka T, Numata M (1982) Regeneration process of climax beech forests I. Structure of a beech forest with the undergrowth of sasa. *Jpn J Ecol* 32:57–67.
- Oguchi R, Hikosaka K, Hirose T (2003) Does the photosynthetic light-acclimation need change in leaf anatomy? *Plant Cell Environ* 26: 505–512.
- Oguchi R, Hikosaka K, Hirose T (2005) Leaf anatomy as a constraint for photosynthetic acclimation: differential responses in leaf anatomy to increasing growth irradiance among three deciduous trees. *Plant Cell Environ* 28:916–927.
- Oguchi R, Hikosaka K, Hiura T, Hirose T (2006) Leaf anatomy and light acclimation in woody seedlings after gap formation in a cool-temperate deciduous forest. *Oecologia* 149:571–582.
- Oguchi R, Hikosaka K, Hiura T, Hirose T (2008) Costs and benefits of photosynthetic light acclimation by tree seedlings in response to gap formation. *Oecologia* 155:665–675.
- Onoda Y, Westoby M, Adler PB et al. (2011) Global patterns of leaf mechanical properties. *Ecol Lett* 14:301–312.
- Pearcy RW (1983) The light environment and growth of C-3 and C-4 tree species in the understory of a Hawaiian Forest. *Oecologia* 58: 19–25.
- Pearcy RW, Sims DA (1994) Photosynthetic acclimation to changing light environments: scaling from the leaf to the whole plant. In: Caldwell MM, Pearcy RW (eds) Exploitation of environmental heterogeneity by plants: ecophysiological processes above and below ground. Academic Press, San Diego, CA, pp 145–174.
- Pearson TRH, Burslem DFRP, Goeriz RE, Dalling JW (2003) Regeneration niche partitioning in neotropical pioneers: effects of gap size, seasonal drought and herbivory on growth and survival. *Oecologia* 137:456–465.
- Phillips OL, Hall P, Gentry AH, Sawyer SA, Vasquez R (1994) Dynamics and species richness of tropical rain-forests. *Proc Natl Acad Sci USA* 91:2805–2809.
- Poorter L (1999) Growth responses of 15 rain-forest tree species to a light gradient: the relative importance of morphological and physiological traits. *Funct Ecol* 13:396–410.
- Poorter L, Kitajima K (2007) Carbohydrate storage and light requirements of tropical moist and dry forest tree species. *Ecology* 88:1000–1011.
- Poorter L, Bongers L, Bongers F (2006) Architecture of 54 moist-forest tree species: traits, trade-offs, and functional groups. *Ecology* 87: 1289–1301.
- Popma J, Bongers F (1991) Acclimation of seedlings of three Mexican tropical rain forest tree species to a change in light availability. *J Trop Ecol* 7:85–97.
- Popma J, Bongers F, Werger MJA (1992) Gap-dependence and leaf characteristics of trees in a tropical lowland rain-forest in Mexico. *Oikos* 63:207–214.
- Reich PB, Walters MB, Ellsworth DS (1992) Leaf life-span in relation to leaf, plant, and stand characteristics among diverse ecosystems. *Ecol Monogr* 62:365–392.
- Reich PB, Tjoelker MG, Walters MB, Vanderklein DW, Bushena C (1998) Close association of RGR, leaf and root morphology, seed mass and shade tolerance in seedlings of nine boreal tree species grown in high and low light. *Funct Ecol* 12:327–338.
- Rijkers T, Pons TL, Bongers F (2000) The effect of tree height and light availability on photosynthetic leaf traits of four neotropical species differing in shade tolerance. *Funct Ecol* 14:77–86.
- Rodriguez-Calcerrada J, Reich PB, Rosenqvist E, Pardos JA, Cano FJ, Aranda I (2008) Leaf physiological versus morphological acclimation to high-light exposure at different stages of foliar development in oak. *Tree Physiol* 28:761–771.
- Rozendaal DMA, Hurtado VH, Poorter L (2006) Plasticity in leaf traits of 38 tropical tree species in response to light; relationships with light demand and adult stature. *Funct Ecol* 20:207–216.
- Ruger N, Wirth C, Wright SJ, Condit R (2012) Functional traits explain light and size response of growth rates in tropical tree species. *Ecology* 93:2626–2636.
- Ryel RI, Beyschlag W (2000) Gap dynamics. In: Marshall B, Roberts JA (eds) Leaf development and canopy growth. Sheffield Academic Press, UK, US and Canada, pp 250–279.
- Sack L, Grubb PJ (2001) Why do species of woody seedlings change rank in relative growth rate between low and high irradiance? *Funct Ecol* 15:145–154.
- Sack L, Grubb PJ (2003) Crossovers in seedling relative growth rates between low and high irradiance: analyses and ecological potential (reply to Kitajima & Bolker 2003). *Funct Ecol* 17:281–287.
- Sakai T, Tanaka H, Shibata M, Suzuki W, Nomiya H, Kanazashi T, Iida S, Nakashizuka T (1999) Riparian disturbance and community structure of a *Quercus-Ulmus* forest in central Japan. *Plant Ecol* 140:99–109.
- Schlichting CD, Pigliucci M (1995) Gene-regulation, quantitative genetics and the evolution of reaction norms. *Evol Ecol* 9:154–168.
- Schmidt MG, Ogden AE, Lertzman KP (1998) Seasonal comparison of soil temperature and moisture in pits and mounds under vine maple gaps and conifer canopy in a coastal western hemlock forest. *Can J Soil Sci* 78:291–300.
- Shibata H, Kirikae M, Tanaka Y, Sakuma T, Hatano R (1998) Proton budgets of forest ecosystems on volcanogenous regosols in Hokkaido, northern Japan. *Water Air Soil Pollut* 105:63–72.
- Silvertown J (2004) Plant coexistence and the niche. *Trends Ecol Evol* 19:605–611.
- Sims DA, Pearcy RW (1992) Response of leaf anatomy and photosynthetic capacity in *Alocasia macrorrhiza* (Araceae) to a transfer from low to high light. *Am J Bot* 79:449–455.
- Takafumi H, Hiura T (2009) Effects of disturbance history and environmental factors on the diversity and productivity of understory vegetation in a cool-temperate forest in Japan. *For Ecol Manage* 257:843–857.
- Takafumi H, Kawase S, Nakamura M, Hiura T (2010) Herbivory in canopy gaps created by a typhoon varies by understory plant leaf phenology. *Ecol Entomol* 35:576–585.
- Tan W, Bogre L, Lopez-Juez E (2008) Light fluence rate and chloroplasts are sources of signals controlling mesophyll cell morphogenesis and division. *Cell Biol Int* 32:563–565.
- Terashima I, Miyazawa S, Hanba Y (2001) Why are sun leaves thicker than shade leaves? Consideration based on analyses of CO<sub>2</sub> diffusion in the leaf. *J Plant Res* 114:93–105.
- Terashima I, Hanba YT, Tholen D, Niinemets U (2011) Leaf functional anatomy in relation to photosynthesis. *Plant Physiol* 155:108–116.
- Toda M, Kolari P, Nakai T et al. (2011) Photosynthetic recovery of foliage after wind disturbance activates ecosystem CO<sub>2</sub> uptake in cool temperate forests of northern Japan. *J Geophys Res Biogeosci* 116:1–14.
- Turnbull MH (1991) The effect of light quantity and quality during development on the photosynthetic characteristics of six Australian rainforest tree species. *Oecologia* 87:110–117.
- Uemura A, Ishida A, Nakano T, Terashima I, Tanabe H, Matsumoto Y (2000) Acclimation of leaf characteristics of *Fagus* species to previous-year and current-year solar irradiances. *Tree Physiol* 20:945–951.
- Umeki K (2001) Growth characteristics of six tree species on Hokkaido Island, northern Japan. *Ecol Res* 16:435–450.
- Valladares F, Wright SJ, Lasso E, Kitajima K, Pearcy RW (2000) Plastic phenotypic response to light of 16 congeneric shrubs from a Panamanian rainforest. *Ecology* 81:1925–1936.
- Walters MB, Reich PB (1999) Low-light carbon balance and shade tolerance in the seedlings of woody plants: do winter deciduous and broad-leaved evergreen species differ? *New Phytol* 143:143–154.
- Watt AS (1947) Pattern and process in the plant community. *J Ecol* 35:1–22.
- Weijschede J, Martinkova J, de Kroon H, Huber H (2006) Shade avoidance in *Trifolium repens*: costs and benefits of plasticity in petiole length and leaf size. *New Phytol* 172:655–666.

- Westoby M, Wright IJ (2006) Land-plant ecology on the basis of functional traits. *Trends Ecol Evol* 21:261–268.
- Whitmore TC (1996) A review of some aspects of tropical rain forest seedling ecology with suggestions for further enquiry. In: Swaine MD (ed) *The ecology of tropical forest tree seedlings. Man and the biosphere series, Vol. 17.* United Nations Education Scientific, and Cultural Organization Publishing, Paris, pp 3–39.
- Whitmore TC, Brown ND (1996) Dipterocarp seedling growth in rain forest canopy gaps during six and a half years. *Philos Trans R Soc London B Biol Sci* 351:1195–1203.
- Wright IJ, Westoby M (2000) Cross-species relationships between seedling relative growth rate, nitrogen productivity and root vs leaf function in 28 Australian woody species. *Funct Ecol* 14:97–107.
- Wright SJ, Kitajima K, Kraft NJB et al. (2010) Functional traits and the growth-mortality trade-off in tropical trees. *Ecology* 91:3664–3674.
- Yamamoto S (1989) Gap dynamics in climax fagus crenata forests. *Botanical Magazine, Tokyo* 102:93–114.
- Yamashita N, Ishida A, Kushima H, Tanaka N (2000) Acclimation to sudden increase in light favoring an invasive over native trees in subtropical islands, Japan. *Oecologia* 125:412–419.
- Yamashita N, Koike N, Ishida A (2002) Leaf ontogenetic dependence of light acclimation in invasive and native subtropical trees of different successional status. *Plant Cell Environ* 25:1341–1356.
- Yano S, Terashima I (2001) Separate localization of light signal perception for sun or shade type chloroplast and palisade tissue differentiation in *Chenopodium album*. *Plant Cell Physiol* 42:1303–1310.
